# Supplementary material for: Docosahexaenoic Acid Decreases Pro-Inflammatory Mediators in an In Vitro Murine Adipocyte Macrophage Co-Culture Model
Source: PubMed Central journal article supplement (PMC3896343; doi:10.1371/journal.pone.0085037), 2014-01-20

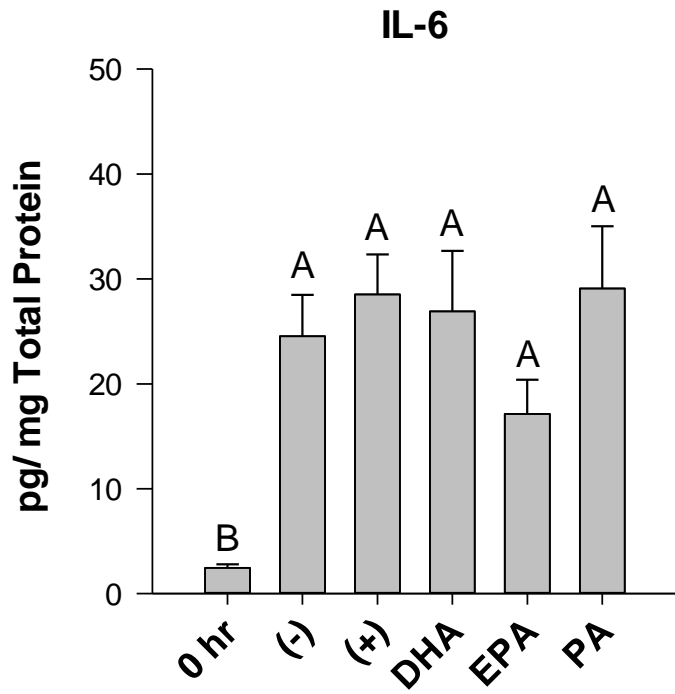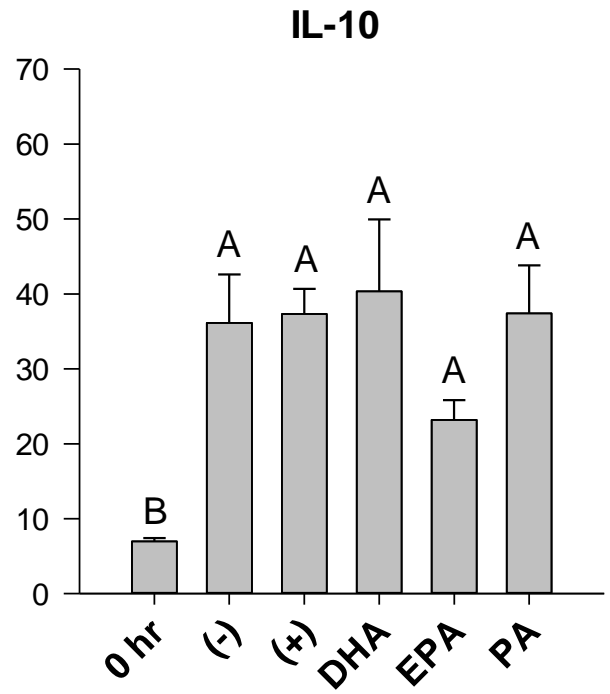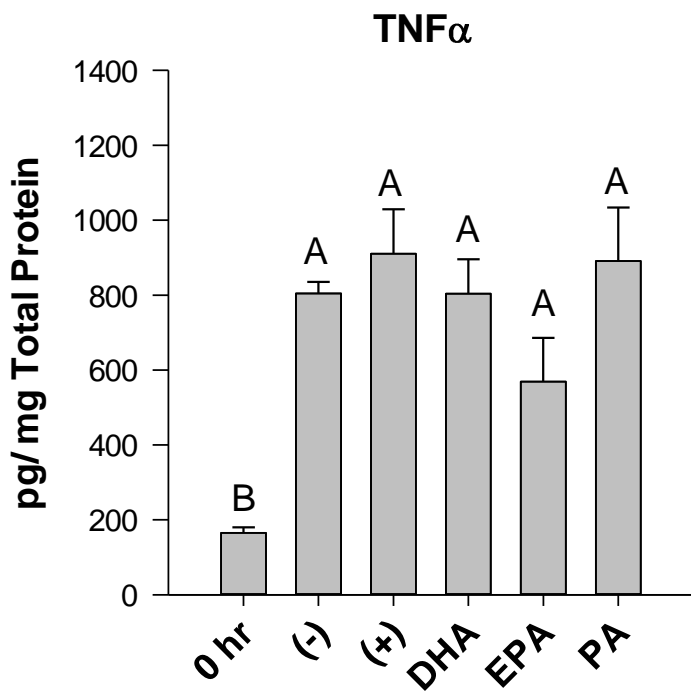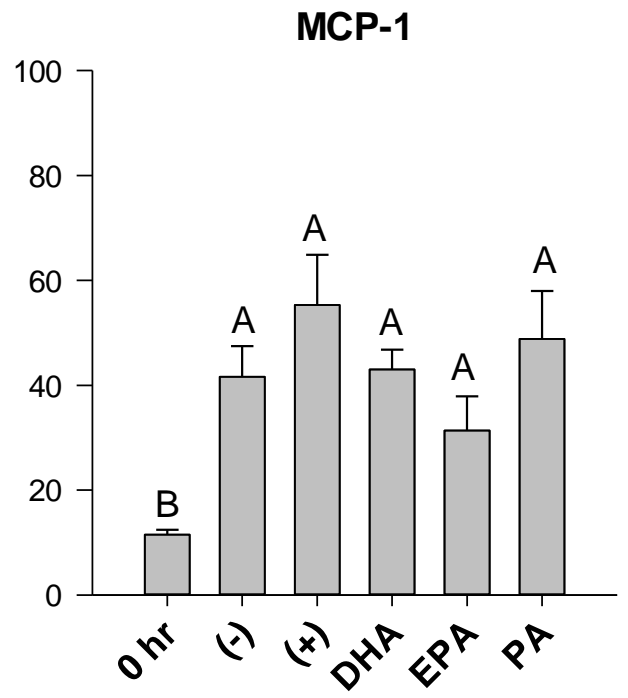

Supplement: pone.0085037.s001.pdf [file pone.0085037.s001.pdf]
